# Healthcare-Associated Mucormycosis

Blandine Rammaert,<sup>1,2</sup> Fanny Lanternier,<sup>1</sup> Jean-Ralph Zahar,<sup>3</sup> Eric Dannaoui,<sup>2,4</sup> Marie-Elisabeth Bougnoux,<sup>5</sup> Marc Lecuit,<sup>1,6</sup> and Olivier Lortholary<sup>1,2</sup>

<sup>1</sup>Université Paris-Descartes, Sorbonne Paris Cité, Hôpital Necker-Enfants Malades, Service des Maladies Infectieuses et Tropicales, APHP, Centre d'Infectiologie Necker-Pasteur; <sup>2</sup>Institut Pasteur, Unité de Mycologie Moléculaire, Centre National de Référence Mycologie et Antifongiques, CNRS URA3012; <sup>3</sup>Université Paris-Descartes, Sorbonne Paris Cité, Hôpital Necker-Enfants Malades, Service de Microbiologie, APHP, Centre d'Infectiologie Necker-Pasteur; <sup>4</sup>Université Paris-Descartes, Sorbonne Paris Cité, Hôpital Georges Pompidou, Unité de Parasitologie-Mycologie, Service de Microbiologie, APHP; <sup>5</sup>Université Paris-Descartes, Sorbonne Paris Cité, Hôpital Necker-Enfants Malades, Unité de Parasitologie-Mycologie, Service de Microbiologie, APHP, Centre d'Infectiologie Necker-Pasteur; and <sup>6</sup>Institut Pasteur, Groupe Microorganismes et Barrières de l'Hôte, Inserm Avenir, Paris, France

**Mucormycosis is a severe emerging invasive fungal infection that occurs as a consequence of environmental exposure. We exhaustively reviewed all the cases of mucormycosis (European Organisation for Research and Treatment of Cancer/Mycoses Study Group 2008 criteria) attributed to healthcare procedures that occurred between 1970 and 2008. A total of 169 cases were studied (29% children, 61% male). Major underlying diseases were solid organ transplantation (24%), diabetes mellitus (22%), and severe prematurity (21%). Skin was the most common localization (57%), followed by gastrointestinal tract (15%). Culture results were available in 75% (92% positive), and results of histological examination were positive in 95%. *Rhizopus* was the most frequent genus (43%). Infection portal of entry included surgery and presence of medical devices such as catheters or adhesive tape. Outbreaks and clusters were related to adhesive bandages (19 cases), wooden tongue depressors (n = 5), ostomy bags (n = 2), water circuitry damage (n = 2), and adjacent building construction (n = 5). Thorough investigations are mandatory to identify healthcare-associated mucormycosis, notably in neonatology, hematological, and transplantation units.**

Rapid diagnosis and treatment of mucormycosis are urgent in clinical mycology. Indeed, the environmental filamentous fungi of the order Mucorales are able to quickly disseminate because of their vascular tropism [1] following trauma in contact with soil or decaying matter [2]. Mucormycosis is also one of the most severe opportunistic infections in patients who have received a transplant, those with diabetes, and those with hematological malignancies [3–7]. Overall, mucormycosis represents 7.2%–8% of invasive fungal infections in recipients of stem cell transplant and 2% in solid organ transplantation (SOT) recipients [3, 8–10].

The incidence of mucormycosis has increased in the past 20 years, in part due to the increasing use of

immunosuppressive drugs or to prolonged antifungal treatments lacking activity against Mucorales [7, 11], such as caspofungin or voriconazole, the latter enhancing *Rhizopus oryzae* virulence [12]. Accordingly, the first-line therapy for most experts is a lipid formulation of amphotericin B in association with aggressive surgery [13]. The diagnosis remains challenging. For any other pathogen, culture is the preferred method for identifying genus and species, but histopathological examination remains essential. Molecular tools have been recently developed to identify different Mucorales directly from tissue samples [14]. Nevertheless, as a consequence of delayed diagnosis and lack of optimal treatment, the mortality remains very high and risk factors for death, such as therapeutic delay, have recently been individualized [6, 7, 10, 15].

Hospitalization and ambulatory care represent risk factors that are well known for infection caused by bacteria, yeasts, or *Aspergillus* species. However, the occurrence of mucormycosis during healthcare procedures is not well documented and is probably underestimated. Moreover, the epidemiological and clinical

Correspondence: O. Lortholary, MD, PhD, Service des Maladies Infectieuses et Tropicales, Hôpital Necker-Enfants Malades, Université Paris Descartes, 149, rue de Sèvres, 75743 Paris Cedex 15, France (olivier.lortholary@nck.aphp.fr).

**Clinical Infectious Diseases** 2012;54(S1):S44–54

© The Author 2012. Published by Oxford University Press on behalf of the Infectious Diseases Society of America. All rights reserved. For Permissions, please e-mail: journals.permissions@oup.com.

DOI: 10.1093/cid/cir867

features, including the outcome of healthcare-associated mucormycosis (HCM), are not known. We have thus reviewed extensively the medical literature to gain a better insight into HCM.

## METHODS

### Search Strategy and Selection Criteria

The PubMed database was used to search for publications of studies restricted to humans with “zygomycosis,” “mucormycosis,” and “phycomycosis” as keywords, plus additional terms, including “*Rhizopus*,” “*Cunninghamella*,” “*Apophysomyces*,” “*Mucor*,” “*Rhizomucor*,” “*Absidia*” (now classified as “*Lichtheimia*”), “*Saksena*,” “hospital-acquired,” “nosocomial,” “healthcare,” “ocular,” “endophthalmitis,” “cornea,” “osteomyelitis,” “graft,” “cutaneous,” “pulmonary,” “cardiac,” “injection,” “thermal,” “water,” “postoperative,” “filamentous fungi,” “prevention,” “preservation fluid,” “air,” “ventilation,” “air conditioner,” “neonates,” “transplant,” “solid organ transplantation,” “bone marrow transplantation,” and “intensive care unit.” After reviewing this initial series of reports, the individual references listed in each publication were again reviewed for identification of additional case reports. All zygomycosis and mucormycosis cases published from January 1970 through December 2008 were recorded for the analysis. To update, recent publications were collected until January 2010.

### Definitions

We qualified cases as HCM when they were associated with any healthcare procedure (medical devices and surgery, including SOT or diagnostic or therapeutic invasive procedures) with an identified or suspected source of infection. We excluded those with unclear infection source, because the mucormycosis incubation period is unknown and numbers of mucormycosis labeled as “nosocomial” were, in fact, probably community acquired. When only immunosuppression or a known trauma was recorded, the case was not retained here [16].

Throughout the manuscript, we will refer to the cases not associated with healthcare as common mucormycosis (CM), except for the cases diagnosed in neonatology units. To compare CM with HCM, we used only data currently available for CM, including, potentially, some HCM cases [7].

The definition of invasive fungal disease has been recently revised [17]. The diagnosis of proven mucormycosis required histological examination of tissue samples. However, in case histopathological examination was not performed, recovery of a Mucorales by culture of a clinical specimen obtained by a sterile procedure from a normally sterile and clinically or radiologically abnormal site was considered to be consistent with proven mucormycosis. Because Mucorales members are environmental fungi, samples from nonsterile sites were excluded,

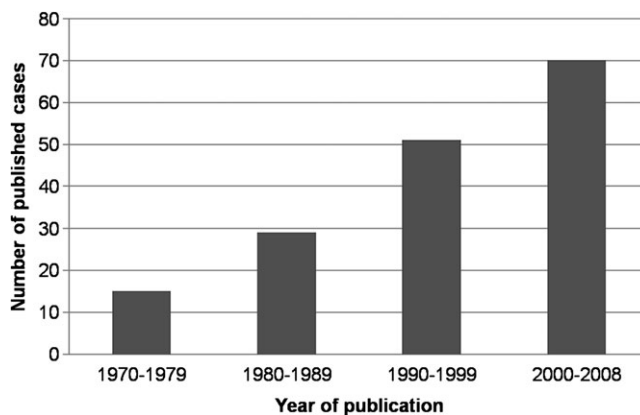

**Figure 1.** Distribution of 169 published cases of healthcare-associated mucormycosis, 1970–2008.

unless a precise microbiological documentation of an environmental contamination was mentioned [18–22]. This last criterion was added to the definition of probable mucormycosis cases in a predisposed patient [17].

All patients >15 years of age were considered adults. Prematurity was defined by a gestational age at birth of <37 weeks, and severe prematurity was defined as birth at <32 weeks' gestation. Documentation of the primary underlying condition was required for each reported case. Any corticosteroid treatment administered at the time of diagnosis was recorded. As described by Roden et al., documentation of the primary site of infection and the localized or disseminated status of the infection ( $\geq 2$  noncontiguous body sites infected) was required [7]. Infections in which acquisition occurred after invasive procedures outside the hospital were retained here but were identified as ambulatory care infections. Reported outbreaks were considered as such when the same fungal species was identified from clinical samples and recently evidenced environmental source. Antifungal and surgical treatments and mortality related to mucormycosis were recorded. Recent modifications in Mucorales classification were taken into account [23, 24].

### Statistical Methods

Ordinal data were presented as mean  $\pm$  standard error of the mean (SEM). Categorical variables were compared using  $\chi^2$  test. A  $P$  value <.05 by univariate analysis was considered to be statistically significant.

## RESULTS

### Demographic Characteristics

A total of 169 individual cases of HCM were identified between 1970 and 2008, of which 121 (72%) were recorded after 1990 (Figure 1). Of these cases, 163 were defined as proven and 6 as

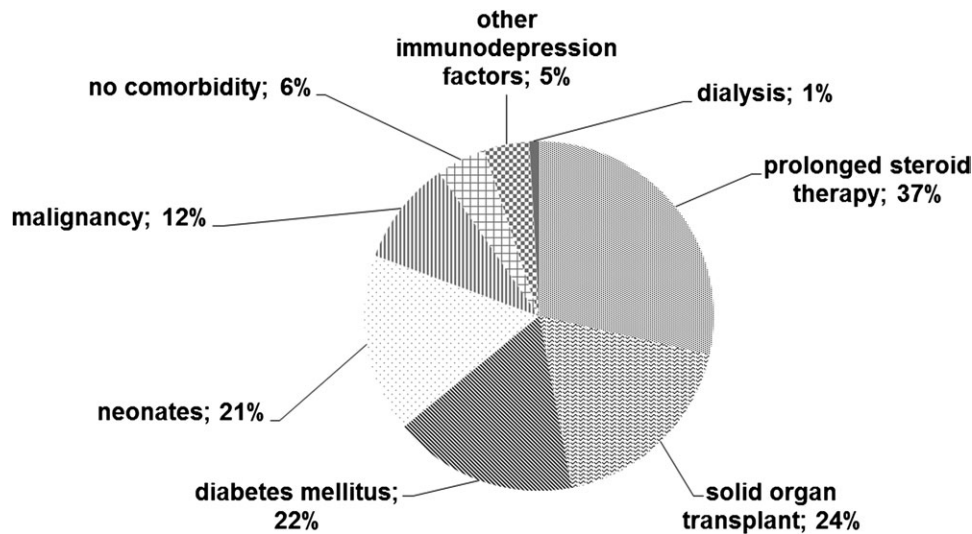

**Figure 2.** Distribution (%) of healthcare-associated mucormycosis risk factors recorded in 169 cases. Malignancies include 20 cases of hematological diseases and 1 solid tumor. Among the former 20 cases, only 2 were marrow allografted. Other immunodepression causes included HIV infection, systemic lupus erythematosus, rheumatoid arthritis, dilated cardiomyopathy, malnutrition, burn, and admission to intensive care unit.

probable mucormycosis. Mean age ( $\pm$  SEM) of patients was  $42 \pm 16$  years. The studied population included 49 children (29%) and 61% male individuals. One hundred forty-eight of 166 patients (89%) underwent treatment: medical alone ( $n = 40$ ), surgical alone ( $n = 18$ ), or both ( $n = 90$ ). Overall mortality rate was 50% (84 of 169 patients died), but was higher when treatment did not combine antifungal drugs and surgery (50% [29 of 58] vs 38% [34 of 90];  $P = .142$ ) and in neonates (64% [23 of 36] vs 46% [61 of 133];  $P = .055$ ).

### Underlying Diseases

Five groups of underlying diseases were individualized: SOT ( $n = 40$ ), malignancy including 2 hematological stem cell transplantations ( $n = 21$ ), neonates ( $n = 36$ ), underlying disorders or treatments leading to immunosuppression ( $n = 46$ ), and absence of identified risk factors ( $n = 26$ ) (Figure 2).

Recent (<3 months) or current immunosuppressive regimens including corticosteroids were prescribed to 62 of 169 (37%) patients. Corticosteroids were prescribed for systemic diseases in 4 of 62 (6%) patients [25–28]. Diabetes mellitus was reported in 37 (22%) of 169 patients and was the only underlying disease in 16 of 169 (9%) patients. More than 1 risk factor was detected in 21 of 169 patients (12%); among them, diabetes mellitus was associated in 12 of 21 (57%) cases with SOT but not with hematological malignancies.

Most of the 169 patients ( $n = 89$  [53%]) were admitted to the surgery unit or intensive care unit. Twenty patients (20%) received ambulatory care. Overall, 69 of 169 (41%) cases of HCM were considered surgical site infections. Cardiovascular surgery ranked first in procedures associated with HCM [25, 29–41],

followed by digestive [25, 42–47], ophthalmologic, urologic, and orthopedic surgery [48–52].

### Primary Localizations of Infection

#### Skin Localizations

HCM involved skin in 96 of 196 (57%) cases. Premature infants (19 of 33 [58%]) and surgical patients (39 of 69 [56%]) were the predominant populations in which cutaneous mucormycosis was observed (Figure 3) [53–57]. Of the 96 patients with skin localization, 22 (23%) underwent SOT and 25 (26%) developed surgical site infection within 19 days (range, 4–60 days) after surgery. Secondary dissemination was reported during 7 of 25 (28%) surgical site infections up to 3 months after contamination [54, 56–61].

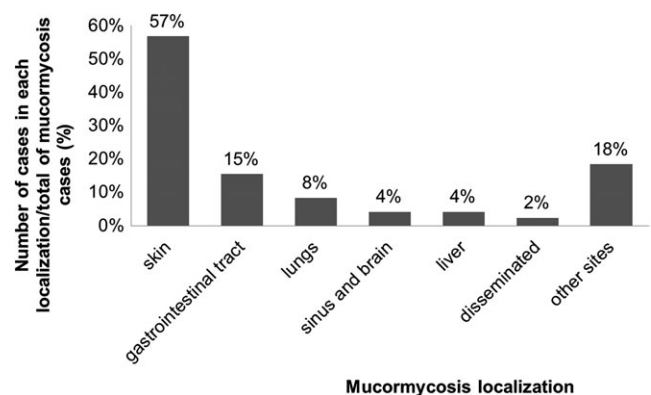

**Figure 3.** Body-site localization in 169 cases of healthcare-associated mucormycosis (%). Other sites ( $n = 31$ ) include heart, kidney, bone, joint, eye, vessels, peritoneum, and bladder.

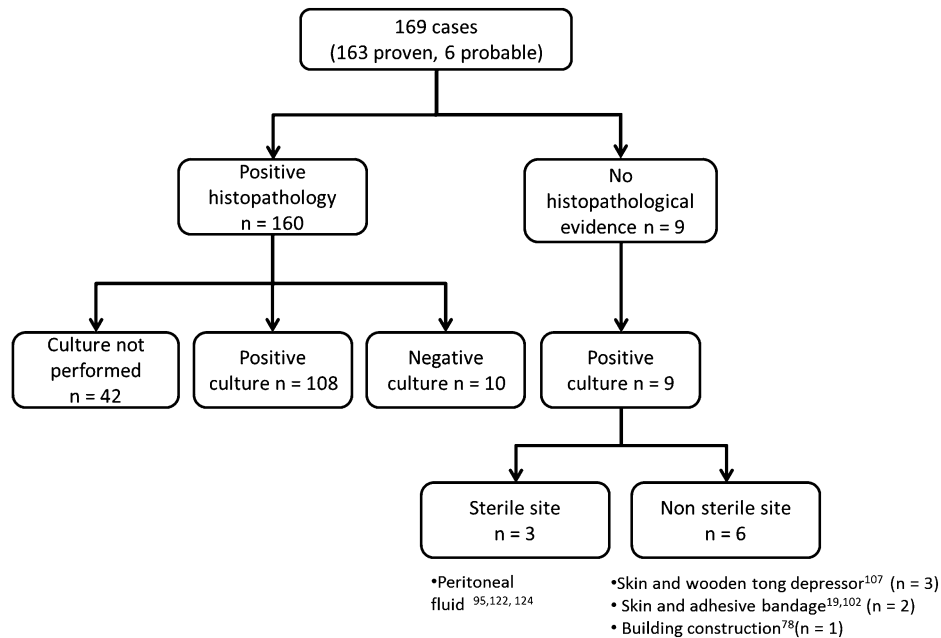

**Figure 4.** Diagnostic strategy performed in 163 proven and 6 probable cases of healthcare-associated mucormycosis.

### Intra-abdominal Localizations

Two different populations were prone to primary gastrointestinal tract infection (n = 21): (1) neonates (12 of 49 [24%] were premature [62–70] and 2 of 49 [4%] were full-term [70, 71]) and (2) nonimmunocompromised adults admitted to the intensive care unit (6 of 21 [29%]) [72, 73] or who underwent digestive surgery (n = 1) [46]. Gut localization was secondary in 5 cases [74–76].

### Pulmonary Localizations

Primary lung involvement was rare (10 of 169 [6%] cases) [77–82]. In contrast, lungs were a secondary localization of hepatic (n = 3) or cutaneous mucormycosis (n = 1) [38, 75]. Lung transplantation was a risk factor, and infection involved bronchial anastomosis [80, 81]. Presence of Mucorales in the donor's respiratory tract should prompt early therapeutic intervention in the recipient.

### Others

Infection of prosthetic valves or cardiac graft causes endocarditis or endovascular infection leading to embolism, aneurysm, graft loss, or aortic rupture [29, 31–33, 35, 36, 39, 40, 61, 83–85]. Endophthalmitis occurring 4–8 weeks after cataract surgery was observed [48–50]. Rhinocerebral involvement and sinusitis were reported in 5 (3%) and 2 (1%) of the 169 cases, respectively [86–89], including some that occurred after dental extraction or airborne contamination. The 4 cases of disseminated mucormycosis occurred after surgery [51, 75] and during extensive renovation [90]. Bone localizations consisted of osteomyelitis, including spondylodiscitis and a tibial abscess [91–93]. Finally, a permanent catheter was responsible for bladder mucormycosis [94].

### Histological/Microbiological Findings

Histological examination was performed in 160 of 169 (95%) cases and always revealed typical hyphae [2]. The 9 remaining cases are described in Figure 4. A culture was performed in 127 of 169 cases (75%), and results were positive in 117 (92%) of these cases, leading to the identification of *Rhizopus* species as the most frequent pathogen (43%). However, a large number of the isolates remained unidentified (Figure 5A). The main localizations according to the Mucorales genera are presented in Figure 5B. *Rhizopus* species were predominantly found in cutaneous mucormycosis (60 of 73 cases [82%]). *Cunninghamella bertholletiae* was responsible for pulmonary (n = 4), cutaneous (n = 2), disseminated (n = 1), or peritoneal (n = 1) mucormycosis [82, 95]. Of note, the use of molecular diagnostic tools was reported in only 2 recent publications [40, 96].

### Outbreaks

#### Adhesive Bandages

The first outbreak was reported in the late 1970s at 10 American hospitals and implicated elasticized bandages contaminated with *Rhizopus* species [19, 97–103] (Table 1). After the manufacturer took preventive measures, the association between mucormycosis and adhesive bandages decreased markedly after 1980. Nevertheless, isolated cases or clusters have occurred in the context of surgical procedures, in premature infants, and more recently, in a burn unit [99, 104, 106].

#### Ostomy Bags and Other Adhesive Devices

A cluster of 2 cases occurred in 2005 in a North American hospital. Ostomy bags that have adhesive containing karaya

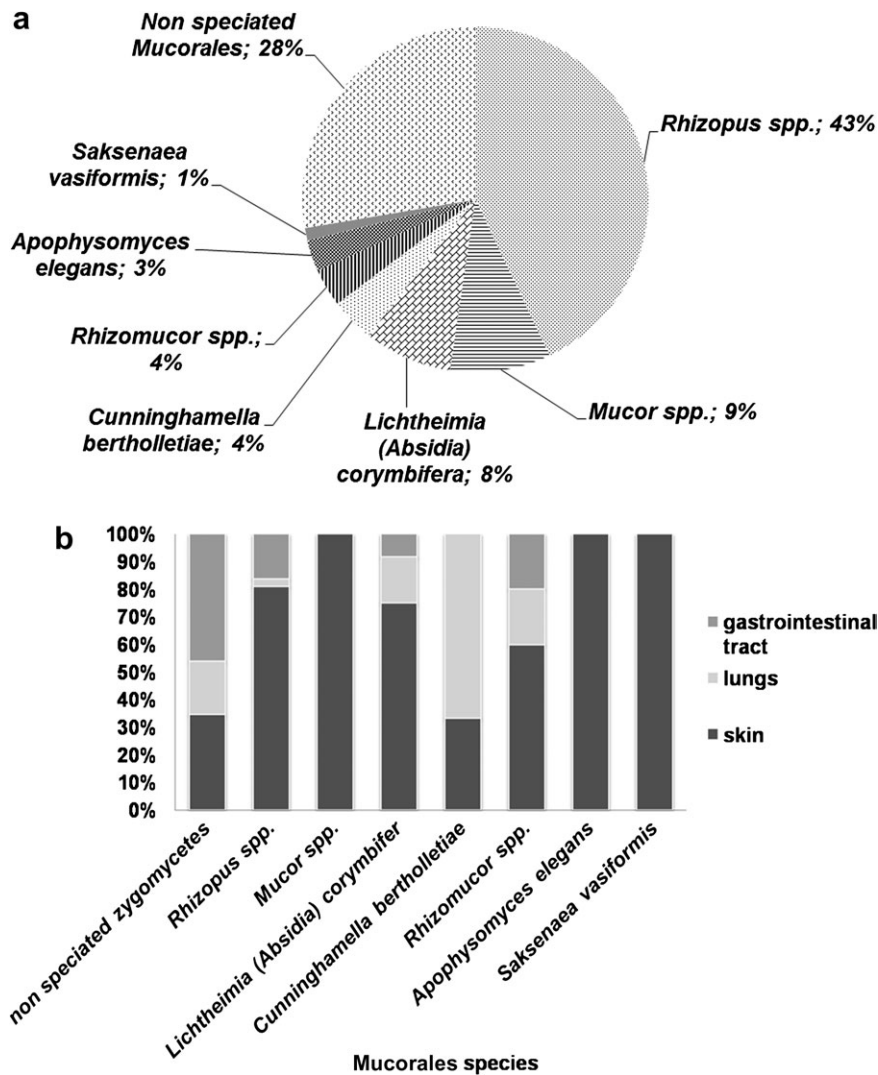

**Figure 5.** A, Distribution of Mucorales species responsible for healthcare-associated mucormycosis. *Rhizopus* species included *R. oryzae* (21 of 73 [29%]), *R. microsporus* (12 of 73 [16%]), and nonspeciati *Rhizopus* species (40 of 73 [55%]). B, Distribution of Mucorales species according to the 3 major body site localizations; skin, gastrointestinal tract, and lungs represented 69% of the localizations.

gum, a product derived from the sap of an exotic tree, were identified as the source of *R. oryzae* [96]. Isolated cases related to the use of ostomy bags have also been reported in a premature infant [76] and in an adult with renal insufficiency [107].

#### Wooden Tongue Depressors

An outbreak in 4 premature infants was reported in 1996 in England [105]. Wooden tongue depressors inserted into a piece of foam tubing were used as splints for intravenous and arterial cannulation sites. Five other clustered cases occurred in 2004 in Spain [72], related to wooden tongue depressors used to prepare oral treatments given through a nasogastric catheter.

#### Environmental Contamination

HCM was documented with environmental samples only in 34 of 169 (20%) cases. All the clusters investigated occurred in hematology (n = 9) or neonatology units (n = 2) [60, 78, 79, 87, 90].

Building construction was implicated in 5 cases and was associated only with pulmonary mucormycosis [78, 79]. Other environmental sources were difficult to investigate. A nasal packing had probably promoted the occurrence of rhinocerebral mucormycosis in 3 patients with acute leukemia [87], and 2 cases were associated with water damage in a room [60].

#### Graft-Transmitted Mucormycosis

Graft may be directly responsible for mucormycosis (24 of 169 cases [14%]), corresponding to 60% of SOT recipients. Clinical features did not differ from the other HCM. Primary hepatic mucormycosis occurred only in liver transplant recipients (n = 6) [5, 74, 75, 108]. Major secondary localizations were lungs and gastrointestinal tract [74, 75]. Renal mucormycosis presented as acute rejection in 4 kidney transplant recipients [109–111]. Time from kidney transplantation to diagnosis of mucormycosis

**Table 1. Published Outbreaks of Healthcare-Associated Mucormycosis**

| Reference | No. of Cases | Origin of Contamination  | Microorganism                         | Localization                | Underlying Condition                                | Death Attributable to Mucormycosis |
|-----------|--------------|--------------------------|---------------------------------------|-----------------------------|-----------------------------------------------------|------------------------------------|
| [103]     | 17           | Elastoplast              | <i>Rhizopus microsporus</i> (8 of 17) | Skin                        | Surgery, corticosteroids, cancer, diabetes mellitus | Not available                      |
| [104]     | 5            | Elastoplast              | <i>Lichtheimia corymbifera</i>        | Skin                        | Burn unit                                           | 3 (60%)                            |
| [72]      | 5            | Wooden tongue depressors | <i>R. microsporus</i>                 | Digestive tract             | ICU, steroids                                       | 3 (60%)                            |
| [105]     | 4            | Wooden tongue depressors | <i>R. microsporus</i>                 | Skin                        | Premature infant                                    | 2 (50%)                            |
| [79]      | 2            | Building construction    | <i>Mucor indicus</i> (1 of 2)         | Lungs                       | Premature infant                                    | 2 (100%)                           |
| [78]      | 3            | Building construction    | <i>Cunninghamella bertholletiae</i>   | Lungs                       | Hematological malignancies                          | 2 (66%)                            |
| [96]      | 2            | Ostomy bags              | <i>Rhizopus</i> species               | Skin                        | Surgery, corticosteroids                            | 1 (50%)                            |
| [60]      | 2            | Water circuitry damage   | <i>Rhizomucor pusillus</i> (1 of 2)   | Rhinocerebral, disseminated | Hematological malignancies                          | 0/2                                |

Abbreviation: ICU, intensive care unit.

was 19 days, 43 days, 2 months, and 9 months. Graft artery mucormycosis was described in 3 cases, and all patients died [84, 85, 108].

### Other Procedures

#### Catheters and Drains

Intravenous or intra-arterial catheters (n = 26), a permanent bladder catheter (n = 1) [94], and thoracic drains (n = 2) were incriminated in several cases [30, 57]. Only 3 studies have investigated the patient's environment and revealed positive Mucorales culture results [60, 66, 112]. In one of the cases, the authors explored the causative link with adhesive bands and ambient air [112]. The sources of contamination have been either the catheter itself or any device in contact with the patient's skin.

#### Adhesive Tapes and Bandages

Cutaneous mucormycosis (n = 11) was associated with the use of adhesive tape [26, 27, 53, 113], adhesive urine bag [59], temperature probe of a radiant heater in a premature infant [53], electrodes for vital-sign monitoring [54, 58], and a skin patch to test for hypersensitivity [114, 115]. The nonsterilized cotton stockingette from a plaster was identified as the source of cutaneous mucormycosis after a pathological arm fracture [116].

#### Dental Extractions

Dental extraction (n = 5) [86, 88, 89, 91, 117] and local anesthesia may cause mucormycosis during the procedure (n = 1) [118]. It was associated with rhinocerebral involvement [86, 88, 89] and osteomyelitis of the maxilla [91, 117]. Two patients had diabetes mellitus [88, 89], and 5 were outpatients. In 5 of 6 cases, the species was not determined.

#### Devices for Diabetic Patients

Patients with type 1 or 2 diabetes are prone to develop mucormycosis [119]. Insulin injections were implicated in

2 cases leading to infection with *C. bertholletiae* or *Rhizomucor pusillus* [28, 120]. Cases linked to the use of blood glucose self-monitoring equipment [121] or with the use of subcutaneous insulin infusion pump [28] have also been described.

#### Intravascular Devices

Intravascular devices, such as artery stent [83], implantable left ventricular assist device [40], and prosthetic valve (n = 4) [31, 33, 35, 39], were incriminated. The isolates involved were either unspicated (n = 2) or belonged to the *Mucor* genus (n = 4).

#### Peritoneal Dialysis

Two of the 4 cases of mucormycosis linked to peritoneal dialysis were caused by *Rhizopus* species [122, 123]. Two cases were caused by *C. bertholletiae* and *Mucor ramosissimus*, respectively, and the species responsible for the last case was not identified [25, 95, 124]. Peritoneal dialysis was performed in each case during ambulatory care.

#### Various Procedures

Anecdotal cases of HCM were identified after intramuscular injection of corticosteroids, vitamins and anticoagulant [125–128], and even nasal packing [87].

## DISCUSSION

HCM and CM share common species distribution, diagnostic difficulties, and poor prognosis, whereas body site, distribution of underlying diseases, and sources of contamination differ. Cases of CM are in large part caused by *Rhizopus* species (47%), as are cases of HCM (43%) [7]. When comparing our study with a recently performed European study including 230 patients, *Mucor* species and *Lichtheimia* (*Absidia*) species were ranked second and third, respectively [129]. It must be kept in mind that almost one-third of the isolates of HCM were not identified. Only 2 publications

noted the contribution of molecular tools for Mucorales identification [40, 96]. Of note, *Saksenaia vasiformis* and *Apophyso-myces. elegans* were always associated with cutaneous HCM, whereas *C. bertholletiae* was the most frequent Mucorales found in pulmonary HCM.

False positivity is also a common problem because of contamination at the time of sampling or in the laboratory by ubiquitous environmental spores [18]. An example of this disadvantage was the pseudo-outbreak of mucormycosis due to the contamination of wooden tongue depressors with *Rhizopus* species [130–132]. Furthermore, 2 patients who had fever of unknown origin and a history of parenteral nutrition developed Mucorales fungemia [133, 134]. We cannot exclude that those 2 cases were in fact attributable to laboratory fungal contamination. Despite the major role of medical and surgical treatments in mucormycosis, the mortality associated with HCM remains high, in fact as high as in CM. In contrast with what is observed during CM, sinus and rhinocerebral involvements were not the main localizations during HCM. Indeed, the rupture of the skin barrier was associated with the majority of HCM, especially after surgical procedures [135]. Of interest, 21 of 26 (81%) immunocompetent patients who developed HCM underwent a surgical procedure, compared with 18% of patients who had CM ( $P < .01$ ) [7, 136]. Patients suffering from hematological malignancy, SOT recipients, and severely premature infants were the most exposed populations to HCM. In the literature, 5%–7% of cases of CM were diagnosed in SOT recipients, whereas this population represented 24% of HCM, mostly because of the high number of graft-transmitted mucormycosis (Table 2) [7, 136]. Thus, cutaneous mucormycosis in those patients should prompt further investigations, especially when the infection site is located under adhesive devices or in contact with catheters or drains. For a long time, air has been suspected as the major source for nosocomial fungal infections [137, 138]. Correlations between the presence of filamentous fungi in the immunocompromised patient's environment and the risk of invasive fungal disease have been reported [139–142]. Investigations about increased airborne fungal load should be conducted especially during hospital renovation and construction activities in the vicinity of the care units [143]. In emerging countries, some operating theaters are equipped with air conditioners but inefficient air filters, which may lead to a significant increased fungal risk [144]. Hospital water is also a potential reservoir for fungi [145]. Nevertheless, this risk seems low, but there is no consensual threshold for water contamination correlated with a risk of developing invasive fungal infections [146].

Various food items contain Mucorales (Table 3) [2]. Even if the food eaten by strongly immunosuppressed patients is controlled [148], Mucorales sporangiospores have been found in food items intended for hematological unit patients [147]. Feeding solutions prepared from commercial solutions [133]

**Table 2. Comparisons Between Common and Healthcare-Associated Mucormycosis**

| Characteristic               | Common Mucormycosis <sup>a</sup> | HCM          | P Value |
|------------------------------|----------------------------------|--------------|---------|
| Age                          | 38.8                             | 42           |         |
| Male sex                     | 605/929 (65)                     | 103/169 (61) | .30     |
| Outcome                      |                                  |              |         |
| Mortality                    | 504/929 (54)                     | 84/169 (50)  | .28     |
| Risk factors                 |                                  |              |         |
| No underlying condition      | 176/929 (19)                     | 26/169 (15)  | .27     |
| Surgery                      | 32/176 (18)                      | 21/26 (81)   | <.01    |
| Underlying condition         |                                  |              |         |
| Diabetes mellitus            | 337/929 (36)                     | 37/169 (22)  | <.01    |
| Malignancy                   | 154/929 (17)                     | 21/169 (12)  | .18     |
| SOT                          | 61/929 (7)                       | 40/169 (24)  | <.01    |
| HSCT                         | 44/929 (5)                       | 2/169 (1)    | .04     |
| Neonates <sup>b</sup>        | 27/929 (3)                       | 36/169 (21)  | <.01    |
| Main body site localizations |                                  |              |         |
| Skin                         | 176/929 (19)                     | 96/169 (57)  | <.01    |
| Gastrointestinal tract       | 66/929 (7)                       | 21/169 (12)  | .02     |
| Lungs                        | 224/929 (24)                     | 10/169 (6)   | <.01    |
| Sinus                        | 359/929 (39)                     | 7/169 (4)    | <.01    |

Abbreviations: HCM, healthcare-associated mucormycosis; HSCT, hematological stem cell transplantation; SOT, solid organ transplantation.

<sup>a</sup> Common mucormycosis includes the cases described by Roden et al during 1940–1999 [7].

<sup>b</sup> Neonates include premature infants, low-birth-weight infants, and full-term neonates hospitalized in a neonatology unit since birth.

and drug preparation may also be implicated, as in a recent alert concerning contaminated allopurinol as a source of gastrointestinal mucormycosis in Hong Kong [149]. Thus, any confirmed primary gastrointestinal mucormycosis should

**Table 3. Various Food Items Contaminated With Mucorales**

| Foodstuffs Known to Contain Mucorales [2] | Foodstuffs Containing Mucorales Found in Hematological Unit [147] |
|-------------------------------------------|-------------------------------------------------------------------|
| Barley                                    |                                                                   |
| Sorghum                                   |                                                                   |
| Wheat                                     |                                                                   |
| Corn                                      |                                                                   |
| Oat                                       |                                                                   |
| Rice                                      | Regular tea                                                       |
| Onions                                    | Biscuits                                                          |
| Cotton                                    | Freeze-dried soup                                                 |
| Groundnuts                                | Pepper                                                            |
| Sweet potatoes                            |                                                                   |
| Pecans                                    |                                                                   |
| Brazil nuts                               |                                                                   |
| Oranges                                   |                                                                   |
| Honey                                     |                                                                   |
| Tomatoes                                  |                                                                   |

prompt microbiological investigations of the drugs administered to the patient.

In conclusion, HCM has become a matter of concern, mostly in heavily immunocompromised patients, such as severely premature neonates, SOT recipients, and those with hematological malignancies. Although it shares common features with CM, the former differs by the frequency of skin involvement, the number of immunocompetent patients who underwent surgery, and clustered cases with a suspected or proven common source of infection. Clusters of mucormycosis deserve careful investigations, particularly regarding biomaterials used for the treatment of severe premature infants, during surgery, and in any immunocompromised patients. Molecular diagnostic tools now more commonly used should help assess the precise environmental fungal source of contamination.

## Notes

**Acknowledgments.** We thank Francoise Dromer, who kindly revised the manuscript and contributed to statistical analysis.

**Supplement sponsorship.** This article was published as part of a supplement entitled “Advances Against Mucormycosis: A Tribute to the Memory and Courage of Hank Schueler,” sponsored by the Henry Schueler 41&9 Foundation.

**Potential conflicts of interest.** E. D. is a member of the boards of MSD and Astellas and has received speaker’s fees from Gilead and MSD. O. L. is a member of the board of MSD and a consultant for Astellas and Gilead Sciences and has received grants or speaker’s fees from MSD and Pfizer. All other authors report no potential conflicts.

All authors have submitted the ICMJE Form for Disclosure of Potential Conflicts of Interest. Conflicts that the editors consider relevant to the content of the manuscript have been disclosed.

## References

1. Spellberg B, Edwards J Jr, Ibrahim A. Novel perspectives on mucormycosis: pathophysiology, presentation, and management. *Clin Microbiol Rev* **2005**; 18:556–69.
2. Ribes JA, Vanover-Sams CL, Baker DJ. Zygomycetes in human disease. *Clin Microbiol Rev* **2000**; 13:236–301.
3. Neofytos D, Horn D, Anaissie E, et al. Epidemiology and outcome of invasive fungal infection in adult hematopoietic stem cell transplant recipients: analysis of Multicenter Prospective Antifungal Therapy (PATH) Alliance registry. *Clin Infect Dis* **2009**; 48:265–73.
4. Pagano L, Offidani M, Fianchi L, et al. Mucormycosis in hematologic patients. *Haematologica* **2004**; 89:207–14.
5. Uckay I, Chalandon Y, Sartoretti P, et al. Invasive zygomycosis in transplant recipients. *Clin Transplant* **2007**; 21:577–82.
6. Almyroudis NG, Sutton DA, Linden P, Rinaldi MG, Fung J, Kusne S. Zygomycosis in solid organ transplant recipients in a tertiary transplant center and review of the literature. *Am J Transplant* **2006**; 6:2365–74.
7. Roden MM, Zaoutis TE, Buchanan WL, et al. Epidemiology and outcome of zygomycosis: a review of 929 reported cases. *Clin Infect Dis* **2005**; 41:634–53.
8. Kontoyiannis DP, Marr KA, Park BJ, et al. Prospective surveillance for invasive fungal infections in hematopoietic stem cell transplant recipients, 2001–2006: overview of the Transplant-Associated Infection Surveillance Network (TRANSNET) Database. *Clin Infect Dis* **2010**; 50:1091–100.
9. Pappas PG, Alexander BD, Andes DR, et al. Invasive fungal infections among organ transplant recipients: results of the Transplant-Associated Infection Surveillance Network (TRANSNET). *Clin Infect Dis* **2010**; 50:1101–11.
10. Singh N, Aguado JM, Bonatti H, et al. Zygomycosis in solid organ transplant recipients: a prospective, international, matched case-control study to assess risk factors and outcome. *J Infect Dis* **2009**; 200:1002–11.
11. Vigouroux S, Morin O, Moreau P, et al. Zygomycosis after prolonged use of voriconazole in immunocompromised patients with hematologic disease: attention required. *Clin Infect Dis* **2005**; 40:e35–7.
12. Lamarinis GA, Ben Ami R, Lewis RE, Chamilos G, Samonis G, Kontoyiannis DP. Increased virulence of Zygomycetes organisms following exposure to voriconazole: a study involving fly and murine models of zygomycosis. *J Infect Dis* **2009**; 199:1399–406.
13. Lanternier F, Lortholary O. Liposomal amphotericin B: what is its role in 2008? *Clin Microbiol Infect* **2008**; 14(Suppl 4):71–83.
14. Dannaoui E, Schwarz P, Slany M, et al. Molecular detection and identification of zygomycetes species from paraffin-embedded tissues in a murine model of disseminated zygomycosis: a collaborative European Society of Clinical Microbiology and Infectious Diseases (ESCMID) Fungal Infection Study Group (EFISG) evaluation. *J Clin Microbiol* **2010**; 48:2043–6.
15. Chamilos G, Lewis RE, Kontoyiannis DP. Delaying amphotericin B-based frontline therapy significantly increases mortality among patients with hematologic malignancy who have zygomycosis. *Clin Infect Dis* **2008**; 47:503–9.
16. Passamonte PM, Dix JD. Nosocomial pulmonary mucormycosis with fatal massive hemoptysis. *Am J Med Sci* **1985**; 289:65–7.
17. De Pauw B, Walsh TJ, Donnelly JP, et al. Revised definitions of invasive fungal disease from the European Organisation for Research and Treatment of Cancer/Invasive Fungal Infections Cooperative Group and the National Institute of Allergy and Infectious Diseases Mycoses Study Group (EORTC/MSG) Consensus Group. *Clin Infect Dis* **2008**; 46:1813–21.
18. Torres-Narbona M, Guinea J, Martinez-Alarcon J, Munoz P, Pelaez T, Bouza E. Workload and clinical significance of the isolation of zygomycetes in a tertiary general hospital. *Med Mycol* **2008**; 46:225–30.
19. Dennis JE, Rhodes KH, Cooney DR, Roberts GD. Nosocomial *Rhizopus* infection (zygomycosis) in children. *J Pediatr* **1980**; 96:824–8.
20. Arisoy AE, Arisoy ES, Correa-Calderon A, Kaplan SL. *Rhizopus* necrotizing cellulitis in a preterm infant: a case report and review of the literature. *Pediatr Infect Dis J* **1993**; 12:1029–31.
21. Trigg ME, Comito MA, Rumelhart SL. Cutaneous *Mucor* infection treated with wide excision in two children who underwent marrow transplantation. *J Pediatr Surg* **1996**; 31:976–7.
22. Ng PC, Dear PR. Phycomycotic abscesses in a preterm infant. *Arch Dis Child* **1989**; 64:862–4.
23. Hoffmann K, Discher S, Voigt K. Revision of the genus *Absidia* (Mucorales, Zygomycetes) based on physiological, phylogenetic, and morphological characters; thermotolerant *Absidia* spp. form a coherent group, Mycocladiaceae fam. nov. *Mycol Res* **2007**; 111:1169–83.
24. Hoffmann K, Walther G, Voigt K. *Mycocladius* vs. *Lichtheimia*: a correction (Lichtheimiaceae fam. nov., Mucorales, Mucoromycotina). *Mycol Res* **2009**; 113:277–8.
25. Adam RD, Hunter G, DiTomasso J, Comerci G Jr. Mucormycosis: emerging prominence of cutaneous infections. *Clin Infect Dis* **1994**; 19:67–76.
26. Dickinson M, Kalayanamit T, Yang CA, Pomper GJ, Franco-Webb C, Rodman D. Cutaneous zygomycosis (mucormycosis) complicating endotracheal intubation: diagnosis and successful treatment. *Chest* **1998**; 114:340–2.
27. Alsuwaida K. Primary cutaneous mucormycosis complicating the use of adhesive tape to secure the endotracheal tube. *Can J Anaesth* **2002**; 49:880–2.



28. Wickline CL, Cornitius TG, Butler T. Cellulitis caused by *Rhizomucor pusillus* in a diabetic patient receiving continuous insulin infusion pump therapy. *South Med J* **1989**; 82:1432–4.
29. Chawla R, Sehgal S, Kumar SR, Mishra B. A rare case of mucormycosis of median sternotomy wound caused by *Rhizopus arrhizus*. *Indian J Med Microbiol* **2007**; 25:419–21.
30. Abter EI, Lutwick SM, Chapnick EK, et al. Mucormycosis of a median sternotomy wound. *Cardiovasc Surg* **1994**; 2:474–7.
31. Chaudhry R, Venugopal P, Chopra P. Prosthetic mitral valve mucormycosis caused by *Mucor* species. *Int J Cardiol* **1987**; 17:333–5.
32. Thomford NR, Dee TH, Sherman NJ, Klainer AS. Mucormycosis of a saphenous vein autograft. *Arch Surg* **1970**; 101:518–19.
33. Khicha GJ, Berroya RB, Escano FB Jr, Lee CS. Mucormycosis in a mitral prosthesis. *J Thorac Cardiovasc Surg* **1972**; 63:903–5.
34. Kerbaul F, Guidon C, Collart F, et al. Abdominal wall mucormycosis after heart transplantation. *J Cardiothorac Vasc Anesth* **2004**; 18:822–3.
35. Mishra B, Mandal A, Kumar N. Mycotic prosthetic-valve endocarditis. *J Hosp Infect* **1992**; 20:122–5.
36. Rainer WG, Liggett MS, Quianzon EP, Dirks DW. Infected aortotomy due to *Mucor* following aortic valve replacement. *J Thorac Cardiovasc Surg* **1970**; 59:781–4.
37. Tobon AM, Arango M, Fernandez D, Restrepo A. Mucormycosis (zygomycosis) in a heart-kidney transplant recipient: recovery after posaconazole therapy. *Clin Infect Dis* **2003**; 36:1488–91.
38. Hurler A, Campos-Herrero MI, Rodriguez H, et al. Cutaneous mucormycosis of the thoracic wall. *Clin Infect Dis* **1996**; 22:373–4.
39. Sanchez-Recalde A, Merino JL, Dominguez F, Mate I, Larrea JL, Sobrino JA. Successful treatment of prosthetic aortic valve mucormycosis. *Chest* **1999**; 116:1818–20.
40. de Repentigny L, St Germain G, Charest H, Kokta V, Vobecky S. Fatal zygomycosis caused by *Mucor indicus* in a child with an implantable left ventricular assist device. *Pediatr Infect Dis J* **2008**; 27:365–9.
41. Clauss H, Samuel R. Simultaneous mold infections in an orthotopic heart transplant recipient. *Transpl Infect Dis* **2008**; 10:343–5.
42. Mathews MS, Raman A, Nair A. Nosocomial zygomycotic post-surgical necrotizing fasciitis in a healthy adult caused by *Apophysomyces elegans* in south India. *J Med Vet Mycol* **1997**; 35:61–3.
43. Lakshmi V, Rani TS, Sharma S, et al. Zygomycotic necrotizing fasciitis caused by *Apophysomyces elegans*. *J Clin Microbiol* **1993**; 31:1368–9.
44. Prasad RM, Bose SM, Vaiphei K, Verma GR. Post operative abdominal wall mucormycosis mimicking as bacterial necrotising fasciitis. *J Postgrad Med* **2003**; 49:187–8.
45. Paparello SF, Parry RL, MacGillivray DC, Brock N, Mayers DL. Hospital-acquired wound mucormycosis. *Clin Infect Dis* **1992**; 14:350–2.
46. Verma GR, Lobo DR, Walker R, Bose SM, Gupta KL. Disseminated mucormycosis in healthy adults. *J Postgrad Med* **1995**; 41:40–2.
47. Wilson CB, Siber GR, O'Brien TF, Morgan AP. Phycomycotic gangrenous cellulitis. A report of two cases and a review of the literature. *Arch Surg* **1976**; 111:532–8.
48. Mohadjer Y, Smith ME, Akduman L. Mucormycosis endophthalmitis after cataract surgery. *Ocul Immunol Inflamm* **2007**; 15:117–20.
49. Locher DH, Adesina A, Wolf TC, Imes CB, Chodosh J. Postoperative *Rhizopus* scleritis in a diabetic man. *J Cataract Refract Surg* **1998**; 24:562–5.
50. Orgel IK, Cohen KL. Postoperative zygomycetes endophthalmitis. *Ophthalmic Surg* **1989**; 20:584–7.
51. Heinemann S. Phycomycosis as postoperative complication of urologic surgery. *Urology* **1981**; 17:65–7.
52. Sheldon DL, Johnson WC. Cutaneous mucormycosis. Two documented cases of suspected nosocomial cause. *JAMA* **1979**; 241:1032–4.
53. du Plessis PJ, Wentzel LF, Delpont SD, van Damme E. Zygomycotic necrotizing cellulitis in a premature infant. *Dermatology* **1997**; 195:179–81.
54. Robertson AF, Joshi VV, Ellison DA, Cedars JC. Zygomycosis in neonates. *Pediatr Infect Dis J* **1997**; 16:812–15.
55. Buchta V, Kalous P, Otcenasek M, Vanova M. Primary cutaneous *Absidia corymbifera* infection in a premature newborn. *Infection* **2003**; 31:57–9.
56. Oh D, Notrica D. Primary cutaneous mucormycosis in infants and neonates: case report and review of the literature. *J Pediatr Surg* **2002**; 37:1607–11.
57. Amin SB, Ryan RM, Metlay LA, Watson WJ. *Absidia corymbifera* infections in neonates. *Clin Infect Dis* **1998**; 26:990–2.
58. Viscoli C, Dodi F, Pellicci E, et al. *Staphylococcus aureus* bacteraemia, *Absidia corymbifera* infection and probable pulmonary aspergillosis in a recipient of orthotopic liver transplantation for end stage liver disease secondary to hepatitis C. *J Infect* **1997**; 34:281–3.
59. Grim PF III, Demello D, Keenan WJ. Disseminated zygomycosis in a newborn. *Pediatr Infect Dis* **1984**; 3:61–3.
60. Garner D, Machin K. Investigation and management of an outbreak of mucormycosis in a paediatric oncology unit. *J Hosp Infect* **2008**; 70:53–9.
61. Page AV, Evans AJ, Snell L, Liles WC. Primary cutaneous mucormycosis in a lung transplant recipient: case report and concise review of the literature. *Transpl Infect Dis* **2008**; 10:419–25.
62. Reimund E, Ramos A. Disseminated neonatal gastrointestinal mucormycosis: a case report and review of the literature. *Pediatr Pathol* **1994**; 14:385–9.
63. Agarwal K, Sharma M, Singh S, Jain M. Antemortem diagnosis of gastrointestinal mucormycosis in neonates: report of two cases and review of literature. *Indian J Pathol Microbiol* **2006**; 49:430–2.
64. Nissen MD, Jana AK, Cole MJ, Grierson JM, Gilbert GL. Neonatal gastrointestinal mucormycosis mimicking necrotizing enterocolitis. *Acta Paediatr* **1999**; 88:1290–3.
65. Siu KL, Lee WH. A rare cause of intestinal perforation in an extreme low birth weight infant—gastrointestinal mucormycosis: a case report. *J Perinatol* **2004**; 24:319–21.
66. Diven SC, Angel CA, Hawkins HK, Rowen JL, Shattuck KE. Intestinal zygomycosis due to *Absidia corymbifera* mimicking necrotizing enterocolitis in a preterm neonate. *J Perinatol* **2004**; 24:794–6.
67. Kecskes S, Reynolds G, Bennett G. Survival after gastrointestinal mucormycosis in a neonate. *J Paediatr Child Health* **1997**; 33:356–9.
68. Woodward A, McTigue C, Hogg G, Watkins A, Tan H. Mucormycosis of the neonatal gut: a “new” disease or a variant of necrotizing enterocolitis? *J Pediatr Surg* **1992**; 27:737–40.
69. Sridhar S, Jana AK, Thomas S, Solomon R. Mucormycosis of the neonatal gastrointestinal tract. *Indian Pediatr* **2001**; 38:294–7.
70. Budhiraja S, Sood N, Singla S, Gupta V. Gastrointestinal mucormycosis in a neonate: survival without antifungal therapy. *Indian J Gastroenterol* **2007**; 26:198.
71. Lewis LL, Hawkins HK, Edwards MS. Disseminated mucormycosis in an infant with methylmalonicaciduria. *Pediatr Infect Dis J* **1990**; 9:851–4.
72. Maravi-Poma E, Rodriguez-Tudela JL, de Jalon JG, et al. Outbreak of gastric mucormycosis associated with the use of wooden tongue depressors in critically ill patients. *Intensive Care Med* **2004**; 30:724–8.
73. Singh N, Gayowski T, Singh J, Yu VL. Invasive gastrointestinal zygomycosis in a liver transplant recipient: case report and review of zygomycosis in solid-organ transplant recipients. *Clin Infect Dis* **1995**; 20:617–20.
74. Vera A, Hubscher SG, McMaster P, Buckels JA. Invasive gastrointestinal zygomycosis in a liver transplant recipient: case report. *Transplantation* **2002**; 73:145–7.
75. Davari HR, Malekhossini SA, Salahi HA, et al. Outcome of mucormycosis in liver transplantation: four cases and a review of literature. *Exp Clin Transpl* **2003**; 1:147–52.
76. White CB, Barcia PJ, Bass JW. Neonatal zygomycotic necrotizing cellulitis. *Pediatrics* **1986**; 78:100–2.
77. Green WR, Bouchette D. Pleural mucormycosis (zygomycosis). *Arch Pathol Lab Med* **1986**; 110:441–2.
78. Rickerts V, Bohme A, Viertel A, et al. Cluster of pulmonary infections caused by *Cunninghamella bertholletiae* in immunocompromised patients. *Clin Infect Dis* **2000**; 31:910–13.

79. Krasinski K, Holzman RS, Hanna B, Greco MA, Graff M, Bhogal M. Nosocomial fungal infection during hospital renovation. *Infect Control* **1985**; 6:278–82.
80. McGuire FR, Grinnan DC, Robbins M. Mucormycosis of the bronchial anastomosis: a case of successful medical treatment and historic review. *J Heart Lung Transpl* **2007**; 26:857–61.
81. Brugiare O, Dauriat G, Mal H, et al. Pulmonary mucormycosis (zygomycosis) in a lung transplant recipient: recovery after posaconazole therapy. *Transplantation* **2005**; 80:544–5.
82. Nimmo GR, Whiting RF, Strong RW. Disseminated mucormycosis due to *Cunninghamella bertholletiae* in a liver transplant recipient. *Postgrad Med J* **1988**; 64:82–4.
83. Liapis CD, Petrikos GL, Paraskevas KI, et al. External iliac artery stent mucormycosis in a renal transplant patient. *Ann Vasc Surg* **2006**; 20:253–7.
84. Zhan HX, Lv Y, Zhang Y, et al. Hepatic and renal artery rupture due to *Aspergillus* and *Mucor* mixed infection after combined liver and kidney transplantation: a case report. *Transpl Proc* **2008**; 40:1771–3.
85. Minz M, Sharma A, Kashyap R, et al. Isolated renal allograft arterial mucormycosis: an extremely rare complication. *Nephrol Dial Transplant* **2003**; 18:1034–5.
86. Chopra H, Dua K, Bhatia S, Dua N, Mittal V. Invasive rhino-orbital fungal sinusitis following dental manipulation. *Mycoses* **2009**; 52:368–71.
87. del Palacio HA, Fereres J, Larregla GS, Rodriguez-Noriega A, Sanz SF. Nosocomial infection by *Rhizomucor pusillus* in a clinical haematology unit. *J Hosp Infect* **1983**; 4:45–9.
88. Szalai G, Fellegi V, Szabo Z, Vitez LC. Mucormycosis mimicks sinusitis in a diabetic adult. *Ann N Y Acad Sci* **2006**; 1084:520–30.
89. Kim J, Fortson JK, Cook HE. A fatal outcome from rhinocerebral mucormycosis after dental extractions: a case report. *J Oral Maxillofac Surg* **2001**; 59:693–7.
90. Weems JJ Jr, Davis BJ, Tablan OC, Kaufman L, Martone WJ. Construction activity: an independent risk factor for invasive aspergillosis and zygomycosis in patients with hematologic malignancy. *Infect Control* **1987**; 8:71–5.
91. Fogarty C, Regennitter F, Viozzi CF. Invasive fungal infection of the maxilla following dental extractions in a patient with chronic obstructive pulmonary disease. *J Can Dent Assoc* **2006**; 72:149–52.
92. Chen F, Lu G, Kang Y, et al. Mucormycosis spondylodiscitis after lumbar disc puncture. *Eur Spine J* **2006**; 15:370–6.
93. Burke WV, Zych GA. Fungal infection following replacement of the anterior cruciate ligament: a case report. *J Bone Joint Surg Am* **2002**; 84-A:449–53.
94. Perez de la Espejo MP, Barrero CR, Chinchon ED, Campoy MP. Bladder mucormycosis. Report of one case. *Arch Esp Urol* **2004**; 57:67–9.
95. Pimentel JD, Dreyer G, Lum GD. Peritonitis due to *Cunninghamella bertholletiae* in a patient undergoing continuous ambulatory peritoneal dialysis. *J Med Microbiol* **2006**; 55:115–18.
96. LeMaile-Williams M, Burwell LA, Salisbury D, et al. Outbreak of cutaneous *Rhizopus arrhizus* infection associated with karaya ostomy bags. *Clin Infect Dis* **2006**; 43:e83–8.
97. Gartenberg G, Bottone EJ, Keusch GT, Weitzman I. Hospital-acquired mucormycosis (*Rhizopus rhizopodiformis*) of skin and subcutaneous tissue: epidemiology, mycology and treatment. *N Engl J Med* **1978**; 299:1115–18.
98. Everett ED, Pearson S, Rogers W. *Rhizopus* surgical wound infection with elasticized adhesive tape dressings. *Arch Surg* **1979**; 114:738–9.
99. Patterson JE, Barden GE, Bia FJ. Hospital-acquired gangrenous mucormycosis. *Yale J Biol Med* **1986**; 59:453–9.
100. Mead JH, Lupton GP, Dillavou CL, Odom RB. Cutaneous *Rhizopus* infection. Occurrence as a postoperative complication associated with an elasticized adhesive dressing. *JAMA* **1979**; 242:272–4.
101. Bottone EJ, Weitzman I, Hanna BA. *Rhizopus rhizopodiformis*: emerging etiological agent of mucormycosis. *J Clin Microbiol* **1979**; 9:530–7.
102. Keys T, Haldorson A, Rhodes KH, Roberts GD, Fifer E. Nosocomial outbreak of *Rhizopus* infections associated with Elastoplast wound dressings. *Morbidity Mortal Week Rep* **1978**; 27:33–4.
103. Centers for Disease Control (CDC). Follow-up on *Rhizopus* infections associated with Elastoplast bandages—United-States. *Morbidity Mortal Week Rep* **1978**; 27:243–4.
104. Christiaens G, Hayette MP, Jacquemin D, Melin P, Mutsers J, De Mol P. An outbreak of *Absidia corymbifera* infection associated with bandage contamination in a burns unit. *J Hosp Infect* **2005**; 61:88.
105. Mitchell SJ, Gray J, Morgan ME, Hocking MD, Durbin GM. Nosocomial infection with *Rhizopus microsporus* in preterm infants: association with wooden tongue depressors. *Lancet* **1996**; 348:441–3.
106. Hughes C, Driver SJ, Alexander KA. Successful treatment of abdominal wall *Rhizopus* necrotizing cellulitis in a preterm infant. *Pediatr Infect Dis J* **1995**; 14:336.
107. Mullens JE, Leers WD, Smith GW. Phycomycosis involving the intestine and anterior abdominal wall: a case report. *Ann Surg* **1970**; 171:303–8.
108. Marco del Pont J, De Cicco L, Gallo G, Llera J, De Santibanez E, D'agostino D. Hepatic arterial thrombosis due to *Mucor* species in a child following orthotopic liver transplantation. *Transpl Infect Dis* **2000**; 2:33–5.
109. Mitwalli A, Malik GH, al Wakeel J, et al. Mucormycosis of the graft in a renal transplant recipient. *Nephrol Dial Transplant* **1994**; 9:718–20.
110. Chkhotua A, Yussim A, Tovar A, et al. Mucormycosis of the renal allograft: case report and review of the literature. *Transpl Int* **2001**; 14:438–41.
111. Tayebi N, Amouian S, Mohamadian N, Rahimi HR. Renal allograft mucormycosis: report of two cases. *Surg Infect (Larchmt)* **2007**; 8:535–8.
112. Telles Filho FQ, Coelho A, Porto E, et al. Subcutaneous mucormycosis caused by *Rhizopus oryzae* probable nosocomial acquired infection. *Rev Inst Med Trop Sao Paulo* **1985**; 27:201–6.
113. Aziz S, Merrell RC, Edwards MF. Mucormycosis in patients with multiple-organ failure. *Arch Surg* **1984**; 119:1189–91.
114. Blair JE, Fredrikson LJ, Pockaj BA, Lucaire CS. Locally invasive cutaneous *Apophysomyces elegans* infection acquired from snapdragon patch test. *Mayo Clin Proc* **2002**; 77:717–20.
115. Lesueur BW, Warschaw K, Fredrikson L. Necrotizing cellulitis caused by *Apophysomyces elegans* at a patch test site. *Am J Contact Dermat* **2002**; 13:140–2.
116. Johnson AS, Ranson M, Scarffe JH, Morgenstern GR, Shaw AJ, Oppenheim BA. Cutaneous infection with *Rhizopus oryzae* and *Aspergillus niger* following bone marrow transplantation. *J Hosp Infect* **1993**; 25:293–6.
117. Salisbury PL III, Caloss R Jr, Cruz JM, Powell BL, Cole R, Kohut RI. Mucormycosis of the mandible after dental extractions in a patient with acute myelogenous leukemia. *Oral Surg Oral Med Oral Pathol Oral Radiol Endod* **1997**; 83:340–4.
118. Vashkevich VP, Kalinovskaia LM, Abramov VA. A complication of local anesthesia during tooth extraction in children. *Stomatologia (Mosk)* **1991**; 6:55–6.
119. Lanternier F, Lortholary O. Zygomycosis and diabetes mellitus. *Clin Microbiol Infect* **2009**; 15:1–5.
120. Quinio D, Karam A, Leroy JP, et al. Zygomycosis caused by *Cunninghamella bertholletiae* in a kidney transplant recipient. *Med Mycol* **2004**; 42:177–80.
121. Hampson FG, Ridgway EJ, Feeley K, Reilly JT. A fatal case of disseminated zygomycosis associated with the use of blood glucose self-monitoring equipment. *J Infect* **2005**; 51:e269–72.
122. Polo JR, Luno J, Menarguez C, Gallego E, Robles R, Hernandez P. Peritoneal mucormycosis in a patient receiving continuous ambulatory peritoneal dialysis. *Am J Kidney Dis* **1989**; 13:237–9.
123. Branton MH, Johnson SC, Brooke JD, Hasbargen JA. Peritonitis due to *Rhizopus* in a patient undergoing continuous ambulatory peritoneal dialysis. *Rev Infect Dis* **1991**; 13:19–21.

124. Serna JH, Wanger A, Dosekun AK. Successful treatment of mucormycosis peritonitis with liposomal amphotericin B in a patient on long-term peritoneal dialysis. *Am J Kidney Dis* **2003**; 42:E14–17.
125. Chakrabarti A, Ghosh A, Prasad GS, et al. *Apophysomyces elegans*: an emerging zygomycete in India. *J Clin Microbiol* **2003**; 41:783–8.
126. Jain JK, Markowitz A, Khilani PV, Lauter CB. Localized mucormycosis following intramuscular corticosteroid. Case report and review of the literature. *Am J Med Sci* **1978**; 275:209–16.
127. Verma KK, Pandhi RK. Subcutaneous mucormycosis in a non-immunocompromised patient treated with potassium iodide. *Acta Derm Venereol* **1994**; 74:215–16.
128. Boyd AS, Wiser B, Sams HH, King LE. Gangrenous cutaneous mucormycosis in a child with a solid organ transplant: a case report and review of the literature. *Pediatr Dermatol* **2003**; 20:411–15.
129. Skiada A, Pagano L, Groll A, et al. Zygomycosis in Europe: analysis of 230 cases accrued by the registry of the European Confederation of Medical Mycology (ECMM) Working Group on Zygomycosis between 2005 and 2007. *Clin Microbiol Infect*. **2011**; 17:1859–67.
130. Verweij PE, Voss A, Donnelly JP, de Pauw BE, Meis JF. Wooden sticks as the source of a pseudoepidemic of infection with *Rhizopus microsporus* var. *rhizopodiformis* among immunocompromised patients. *J Clin Microbiol* **1997**; 35:2422–3.
131. Holz H, Macqueen S, MacDonald A, et al. *Rhizopus microsporus* in wooden tongue depressors: a major threat or minor inconvenience? *J Hosp Infect* **1998**; 38:113–18.
132. Harper JJ, Coulter C, Lye GR, Nimmo GR. *Rhizopus* and tongue depressors. *Lancet* **1996**; 348:1250.
133. Todd NJ, Millar MR, Dealler SR, Wilkins S. Inadvertent intravenous infusion of *Mucor* during parenteral feeding of a neonate. *J Hosp Infect* **1990**; 15:295–7.
134. Chan-Tack KM, Nemoj LL, Perencevich EN. Central venous catheter-associated fungemia secondary to mucormycosis. *Scand J Infect Dis* **2005**; 37:925–7.
135. Antoniadou A. Outbreaks of zygomycosis in hospitals. *Clin Microbiol Infect*. **2009**; 15(Suppl 5):55–9.
136. Bitar D, Van Cauteren D, Lanternier F, et al. Increasing incidence of zygomycosis (mucormycosis), France, 1997–2006. *Emerg Infect Dis* **2009**; 15:1395–401.
137. Noble WC, Clayton YM. Fungi in the air of hospital wards. *J Gen Microbiol* **1963**; 32:397–402.
138. Simmons RB, Price DL, Noble JA, Crow SA, Ahearn DG. Fungal colonization of air filters from hospitals. *Am Ind Hyg Assoc J* **1997**; 58:900–4.
139. Panagopoulou P, Filioti J, Farmaki E, Maloukou A, Roilides E. Filamentous fungi in a tertiary care hospital: environmental surveillance and susceptibility to antifungal drugs. *Infect Control Hosp Epidemiol* **2007**; 28:60–7.
140. Panagopoulou P, Filioti J, Petrikos G, et al. Environmental surveillance of filamentous fungi in three tertiary care hospitals in Greece. *J Hosp Infect* **2002**; 52:185–91.
141. Patterson JE, Peters J, Calhoun JH, et al. Investigation and control of aspergillosis and other filamentous fungal infections in solid organ transplant recipients. *Transpl Infect Dis* **2000**; 2:22–8.
142. Menotti J, Waller J, Meunier O, Letscher-Bru V, Herbrecht R, Candolfi E. Epidemiological study of invasive pulmonary aspergillosis in a haematology unit by molecular typing of environmental and patient isolates of *Aspergillus fumigatus*. *J Hosp Infect* **2005**; 60:61–8.
143. Sautour M, Sixt N, Dalle F, et al. Prospective survey of indoor fungal contamination in hospital during a period of building construction. *J Hosp Infect* **2007**; 67:367–73.
144. Kelkar U, Bal AM, Kulkarni S. Fungal contamination of air conditioning units in operating theatres in India. *J Hosp Infect* **2005**; 60:81–4.
145. Warris A, Gaustad P, Meis JF, Voss A, Verweij PE, Abrahamsen TG. Recovery of filamentous fungi from water in a paediatric bone marrow transplantation unit. *J Hosp Infect* **2001**; 47:143–8.
146. Kauffmann-Lacroix C, Bousseau A, Dalle F, et al. Prevention of fungal infections related to the water supply in French hospitals: proposal for standardization of methods. *Presse Med* **2008**; 37:751–9.
147. Bouakline A, Lacroix C, Roux N, Gangneux JP, Derouin F. Fungal contamination of food in hematology units. *J Clin Microbiol* **2000**; 38:4272–3.
148. Brenier-Pinchart MP, Faure O, Garban F, et al. Ten-year surveillance of fungal contamination of food within a protected haematological unit. *Mycoses* **2006**; 49:421–5.
149. Cheng VC, Chan JF, Ngan AH, et al. Outbreak of intestinal infection due to *Rhizopus microsporus*. *J Clin Microbiol* **2009**; 47:2834–43.
